# Supplementary material
Source: PubMed Central journal article supplement (PMC7087109)
Supplement: 705_2013_1741_MOESM1_ESM.pdf [file 705_2013_1741_MOESM1_ESM.pdf]

Fig. S1

Characterization of Dak Nong virus, a insect nidovirus isolated from *Culex* mosquitoes in Vietnam in Archives of Virology by Kuwata *et al.*. Corresponding author; Haruhiko Isawa, Ph. D. of National Institute of Infectious Diseases. E-mail, hisawa@nih.go.jp

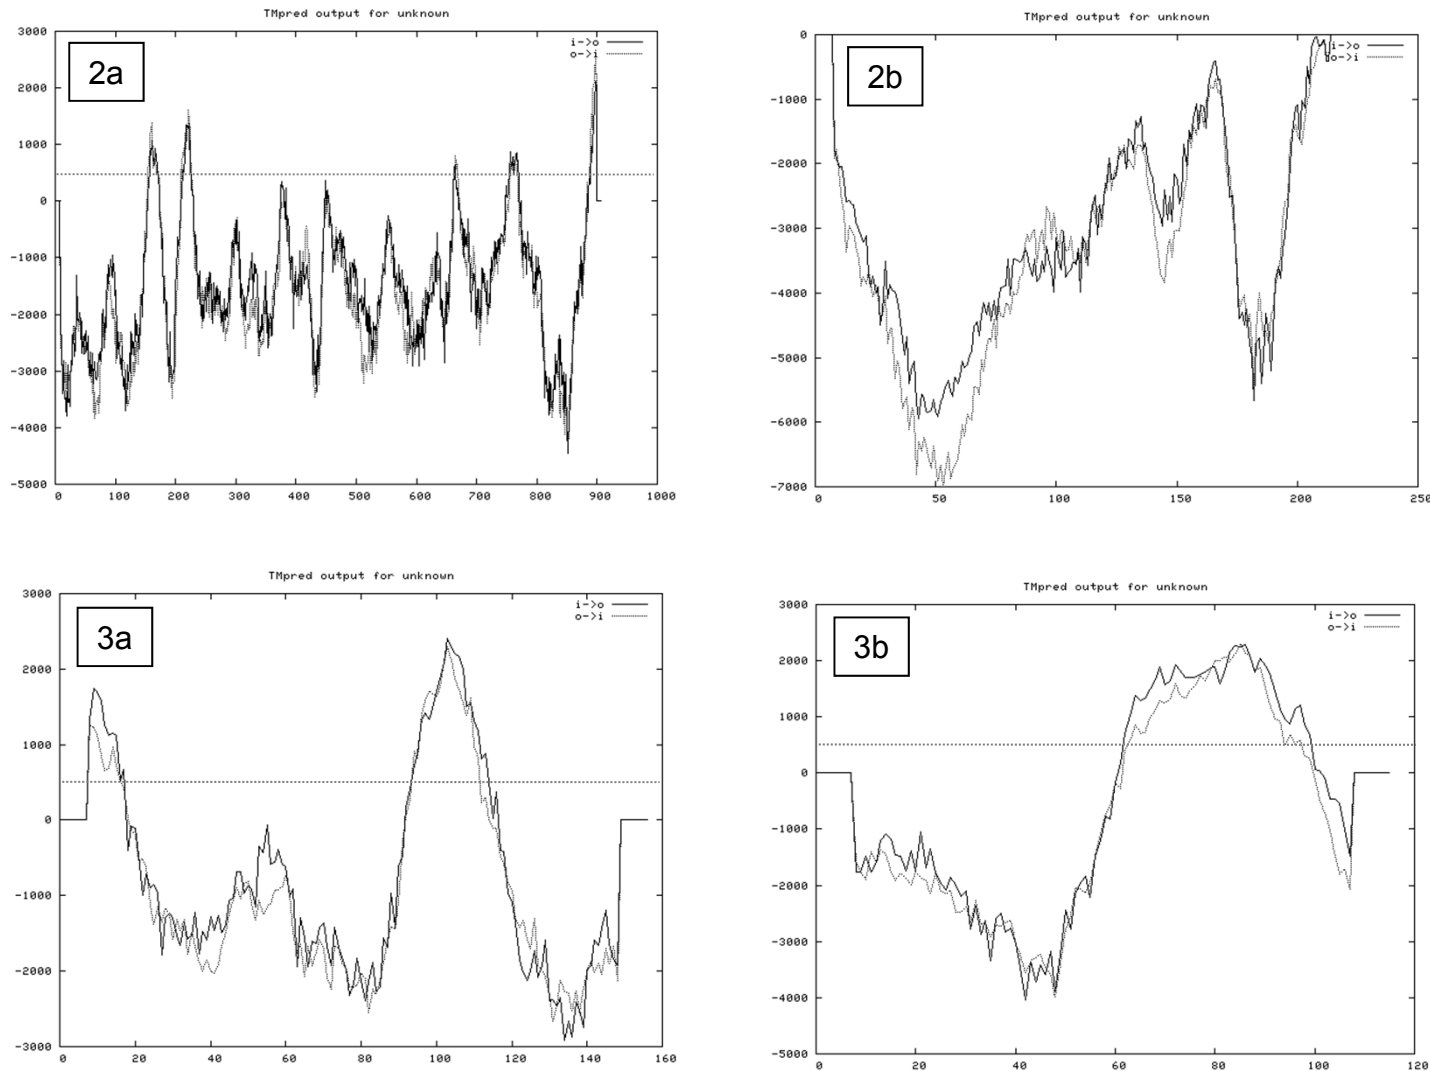

**Fig. S1** Hydrophobicity plots for the predicted DKNV structural proteins encoded by ORF2a, ORF2b, ORF3a, and ORF3b. Hydrophobicities of the four putative structural proteins were calculated using TMpred [20]. Horizontal dashed lines depict the threshold (value of 500) for significant association with transmembrane helices.

Fig. S2

Characterization of Dak Nong virus, a insect nidovirus isolated from *Culex* mosquitoes in Vietnam in Archives of Virology by Kuwata *et al.*. Corresponding author; Haruhiko Isawa, Ph. D. of National Institute of Infectious Diseases. E-mail,hisawa@nih.go.jp

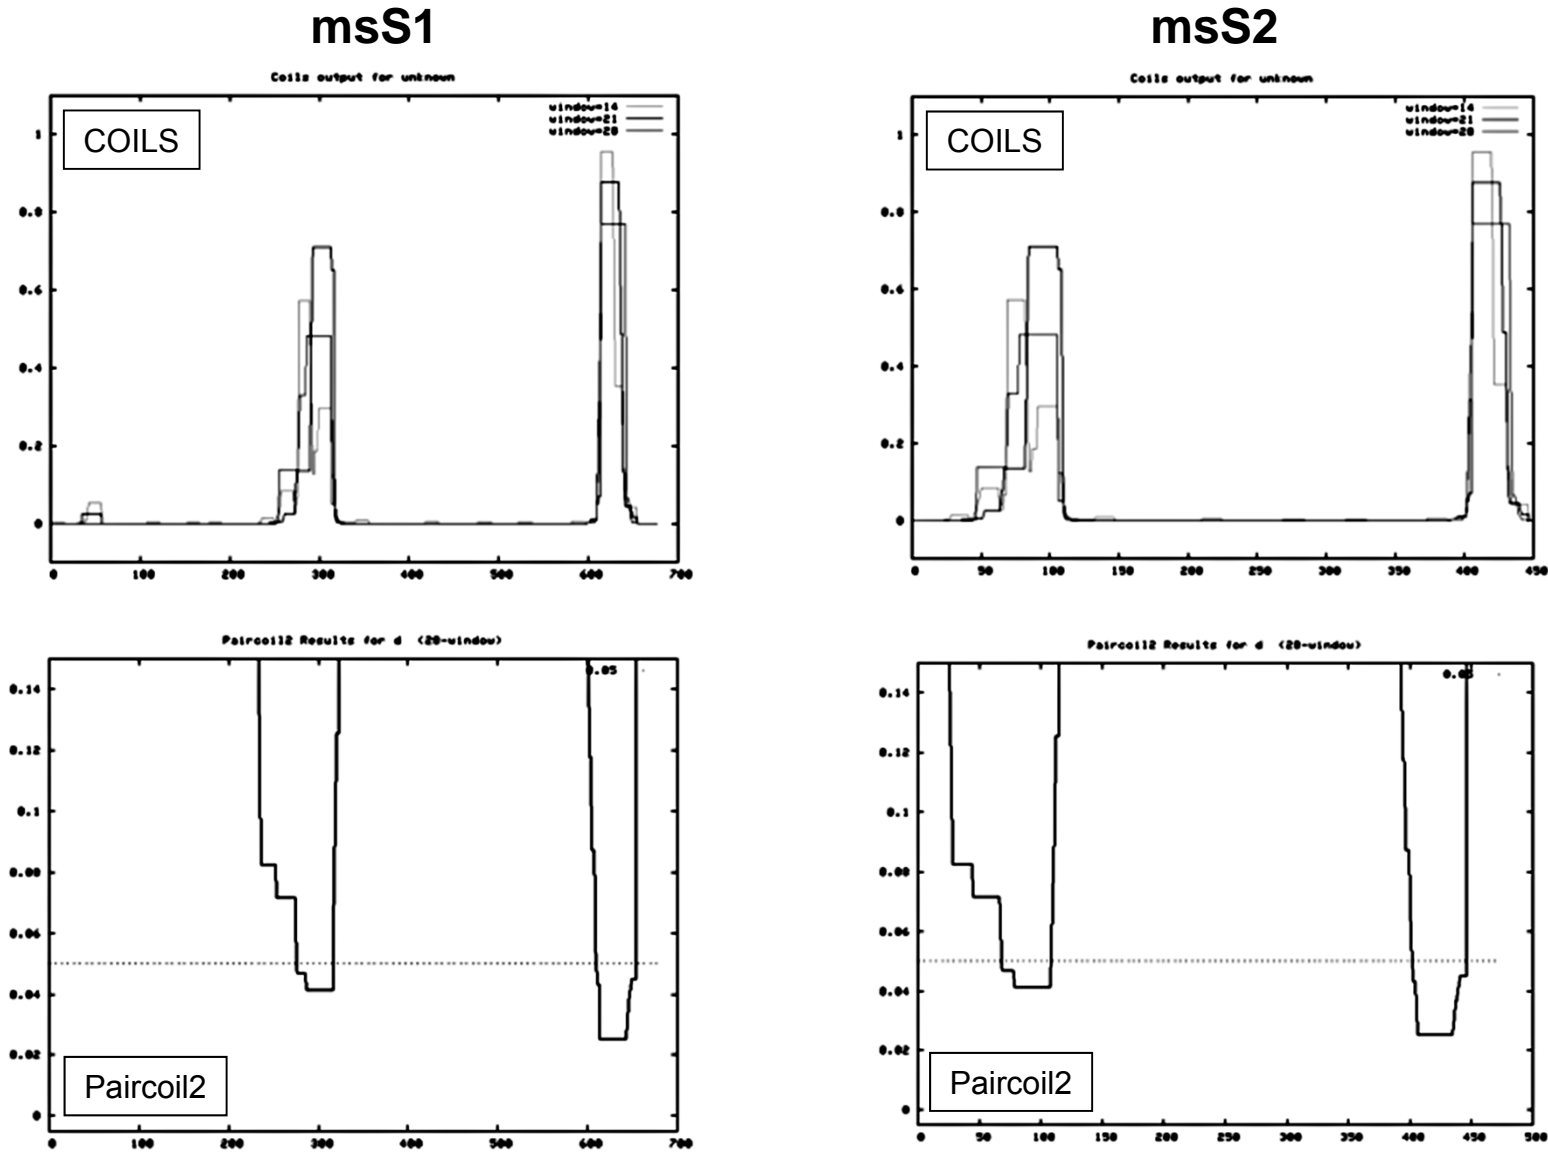

**Fig. S2** Regions of coiled-coil structure in the two types of DKNV spike glycoprotein, msS1 and msS2, predicted using the COILS [24] and Paircoil2 [25] programs.

Fig. S3

Characterization of Dak Nong virus, a insect nidovirus isolated from *Culex* mosquitoes in Vietnam in Archives of Virology by Kuwata *et al.*. Corresponding author; Haruhiko Isawa, Ph. D. of National Institute of Infectious Diseases. E-mail, hisawa@nih.go.jp

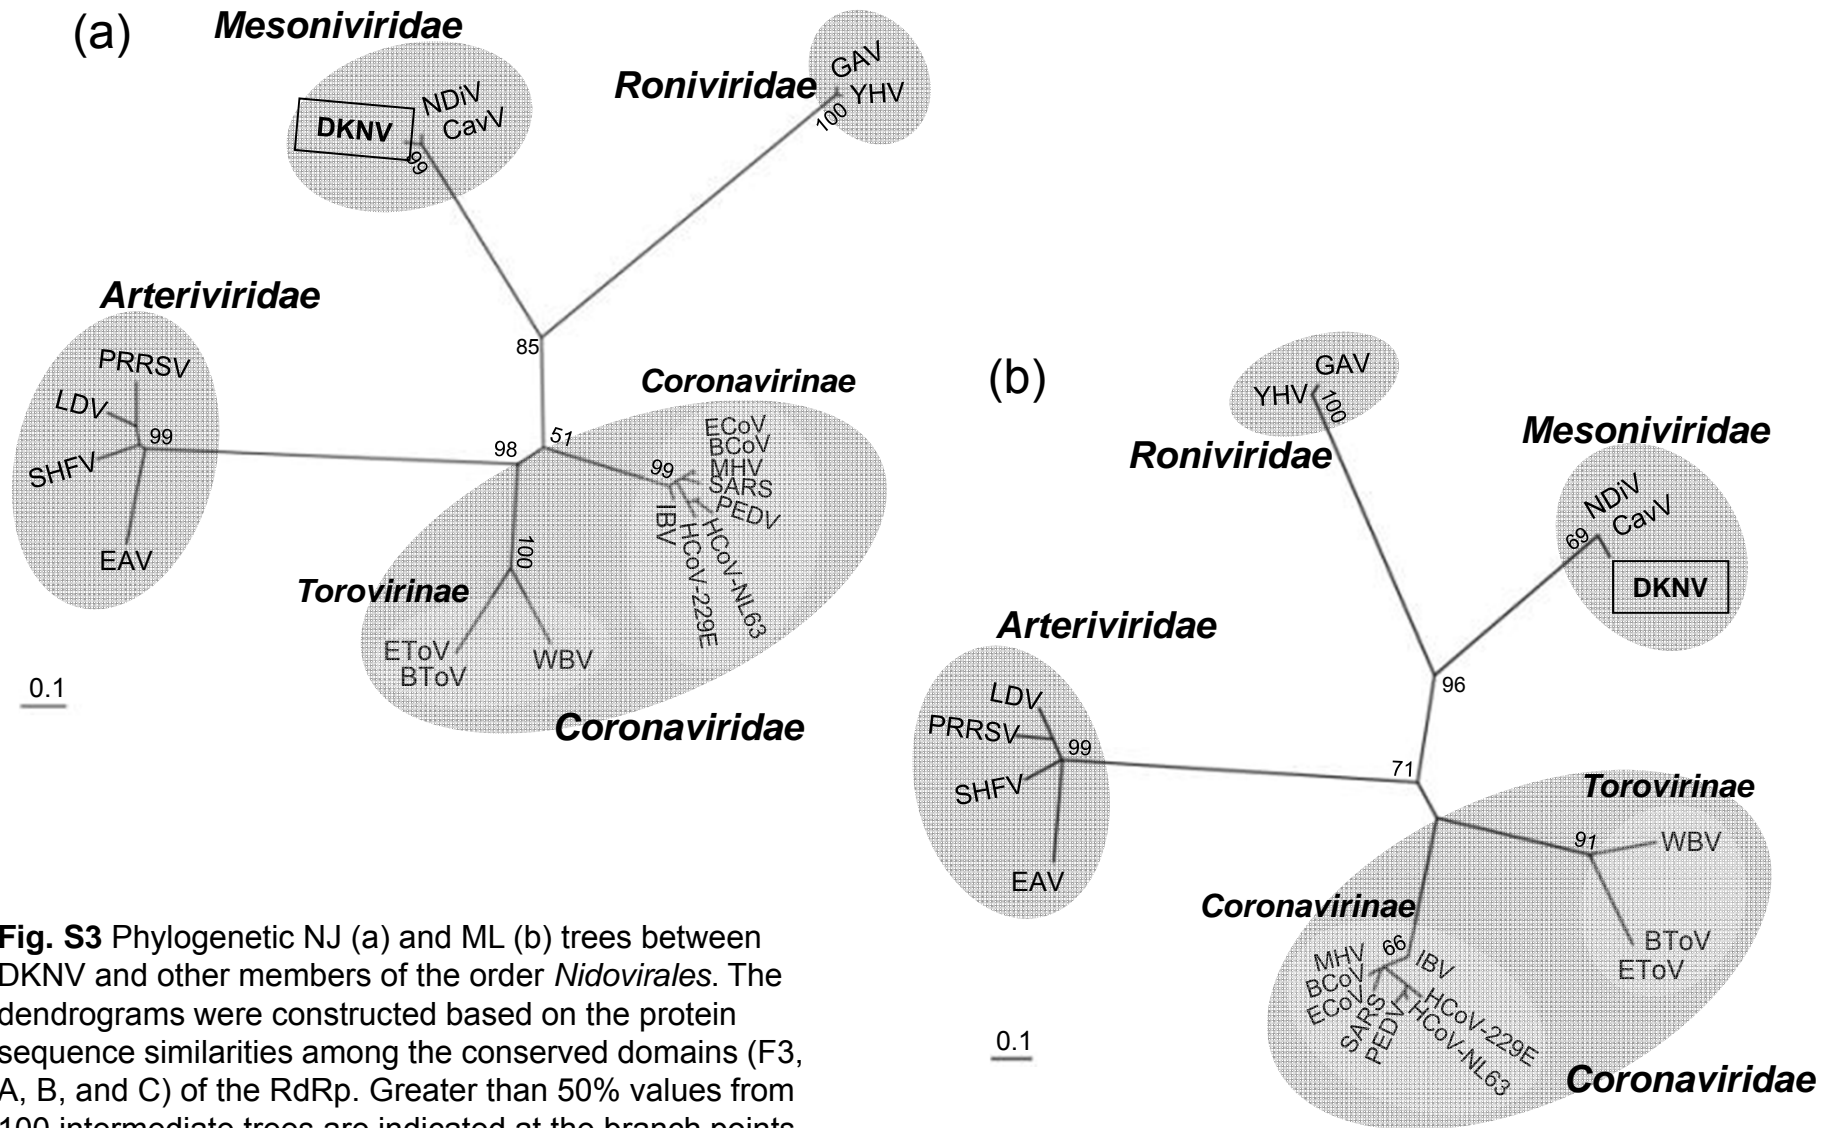

**Fig. S3** Phylogenetic NJ (a) and ML (b) trees between DKNV and other members of the order *Nidovirales*. The dendrograms were constructed based on the protein sequence similarities among the conserved domains (F3, A, B, and C) of the RdRp. Greater than 50% values from 100 intermediate trees are indicated at the branch points. Bar represents 0.1 substitutions per site.

# Fig. S4

Characterization of Dak Nong virus, a insect nidovirus isolated from *Culex* mosquitoes in Vietnam in Archives of Virology by Kuwata *et al.*. Corresponding author; Haruhiko Isawa, Ph. D. of National Institute of Infectious Diseases. E-mail, hisawa@nih.go.jp

(a)

```
DKNV 301 NELEDDTEAEETLKSKRKGKSGEFSKTSKSRKETHIQNSNDAETPETLKTATAENVAQNGLQNASASTKQKRKGK-LTPQTQLLDHTL-NQTRLAHRTPY 398
NDiV 300 S.QD.....D.Q.N.....-----Q.K.....Q...AK..KF.R.Q.F 344
CavV 300 L.I.....Q.T.....-----Q.....Q...AK.SKP.R.QSH 343
```

(b)

```
DKNV 1695 RLLSDFNITAEQYVQHGYNVDYNNFV-----SCIKYGLMDNKNVTYNNQSATSVSVVDAPTR-LDYILDVLYVLLYMFTHTHPAFYIA 1776
NDiV 1644 .....A.Y...I.....INNENRYTTTTIGTKSFET.....K.E.Y..T..IFNPPEHSSSGF.NTM.....FV..... 1743
CavV 1640 .....N.Y..YI.....NNENRYTTTTIGTKSFET.....KPD.Y.....IFNSPEHSSSGF.NTM.....FV..... 1739
```

**Fig. S4** Alignment of the partial ORF1a sequences among DKNV, NDiV, and CavV. DKNV ORF1a protein contain a 55-aa insertion (<sub>319</sub>K to <sub>374</sub>G) (a) and a 22-aa deletion (<sub>1720</sub>V to <sub>1721</sub>S) (b) compared with NDiV and CavV.

Fig. S5

Characterization of Dak Nong virus, a insect nidovirus isolated from *Culex* mosquitoes in Vietnam in Archives of Virology by Kuwata *et al.*. Corresponding author; Haruhiko Isawa, Ph. D. of National Institute of Infectious Diseases. E-mail, hisawa@nih.go.jp

|      |      |   |                                                                                                          |
|------|------|---|----------------------------------------------------------------------------------------------------------|
| 3CL  | DKNV | 1 | SSLRGAIVNGYIYVQRHLFGSKKQFEFEACYNNGKGLLNCHNLERSKYDIDS AELIGTLIRIPLLNDHSPFKIKLHPAPLTYNGPVTLYLSRYDTELQKDV   |
|      | NDiV | 1 | .....V.....I.....K..D.....HDKQ.I.H.S...D..S.....N...                                                     |
|      | CavV | 1 | .....V.....I.....K.....HDK..I.H.SI..D..S.....N...                                                        |
|      | DKNV |   | LCVHTGFISEGHHDIKTVFGDCGGMLFDPKGRLLGLHCAG 140                                                             |
|      | NDiV |   | .....M..... 140                                                                                          |
|      | CavV |   | .....M..... 140                                                                                          |
| HEL1 | DKNV | 1 | TNYCYVCGENAYLTCATCERAFNCNSADTDHGSHIEQHLQYSGHTCLYLNCKTVKCKHCYTNDINLLYTTGREHYCEAHKPKHAARI 86               |
|      | NDiV | 1 | .....N.....M.....Q..F.M.....D...S...N.V.. 86                                                             |
|      | CavV | 1 | .....N.....M.....H..F.T.....D.....N.V.. 86                                                               |
| EXON | DKNV | 1 | FPINIVMNDYICFDAEFLNPKDNLQEPVMLS YGFSSKYGKRR IAGIPVRYIKDRFDKIVPQ EYNYRDN NKPLTSTYNCEW MRKQYPDQYKHLHSVTQGI |
|      | NDiV | 1 | ..M...D.C.....R..V.....K.NR...K..K.....T.D....H.E.....T..M...                                            |
|      | CavV | 1 | ..M...D.C.....R.....K.NR..I.HK...K.....S.D..K..H.....T..L...                                             |
|      | DKNV |   | RNSTLVDLKP LLNFCVDMHVKPVI VTWAGASDH CFLKANTLYPDISTVCNITTRCSSQP VYAS PQGLHTYYLCQYHAHHLQGYINITHFVNLEIIDLKL |
|      | NDiV |   | ..D.T.....S.....H.....A.....I..T..I.....R.....Q.KDHV.....V                                               |
|      | CavV |   | ..D.T..R.....S.....R.H.....T..I.....R.....Q.KDH.....V                                                    |
|      | DKNV |   | NYNQYTGERILNVFHENLKLKLENVASNSLTDCHARYCRTVHAPITPHDPLDSSIMTQCIYQ 265                                       |
|      | NDiV |   | DR...D..T.R.Y..DY...T.D.D.....T.....A.....A..... 265                                                     |
|      | CavV |   | DR...N..T.R.Y..DY...T.D.D.....T.....I..P.....A..... 265                                                  |
| N-MT | DKNV | 1 | EMCKLRRELQQVWYKQYVDHNITHCNMGCGKDHLKHALHNI DILQ GK-NPQNNMNTHTCD AEEHIYFDSHWYKEGNFTKPSYIFSDINKEHYYNLGT TGL |
|      | NDiV | 1 | .....K...S..TNT.K.....EP.QQ.....V.....S.....S.....A.G.....K.....                                         |
|      | CavV | 1 | .....K...EK..I.TKK.....EP.QQ.....V.....S.....S.....D.G.K.....K.....                                      |
|      | DKNV |   | SLYLNSKCAKYVHEYRTINGTDVFKTLYAQYCALERQPHQAAIKPSCSIPDCIITSNIGENFQTLVCNVHKDQMDIIGKISQATGYGYQFIYTG 193       |
|      | NDiV |   | C.....Y.....VS.N...S..SP..D.G.K...E.E.....R.....S.....K..... 194                                         |
|      | CavV |   | C.....Y.....VS.N...S..SP..D.G.K...V.E.....R.....Q...EL.S.A..K..... 194                                   |
| O-MT | DKNV | 1 | SALSKAPHNWDHLEIPGYNTRKQHSGHMTTKALGILHILQDSMLYTNRKTLPKLPVIMPGSASF LGETVLANEMSKYLKQTKFIHVDPRLKIDNQTT       |
|      | NDiV | 1 | A.....S.....N...L...Y..D.....A.T.....I.....N...                                                          |
|      | CavV | 1 | A..A..LD.....S.....N...L...Y..D.....T.....V.I.....N...                                                   |
|      | DKNV |   | HYRKTLMEMLDIGYTTTELIISDIHNNTSPWIPELVSYTQKYLIDTGTLMKITSRGATEDNLALLETL SKDFTYVRCNLNAVITYSSELWIVFADKRKPP    |
|      | NDiV |   | .H.....D.KN.....MT..L..V.....V.QQ..D..N.....F.....N.....                                                 |
|      | CavV |   | .H.....D.NN.....ME..L.....AV.QQ..HMA.N.....F.....N.....                                                  |
|      | DKNV |   | VQGWTSHELKSELRKHWYAMTRSIIQPIMRSRTC VFRYSPK 241                                                           |
|      | NDiV |   | .....RA.....S.....L...QS..... 241                                                                        |
|      | CavV |   | .....RA.....S.....L..A.QS..... 241                                                                       |

Fig. S5 Alignment of the deduced amino acid sequences of the conserved functional domains of ORF1a/b (3CL, HEL1, EXON, N-MT, and O-MT) among DKNV, NDiV, and CavV.

# Fig. S6

Characterization of Dak Nong virus, a insect nidovirus isolated from *Culex* mosquitoes in Vietnam in Archives of Virology by Kuwata *et al.*. Corresponding author; Haruhiko Isawa, Ph. D. of National Institute of Infectious Diseases. E-mail, hisawa@nih.go.jp

|      |     |                                                                                  |     |
|------|-----|----------------------------------------------------------------------------------|-----|
| DKNV | 1   | -ACUAUUGAAAAU <u>UUGUUU</u> CACCC <u>AAUAAUACUACUACU</u> ACAAGUAUAACCCCCAGUCC    | 59  |
| NDiV | 1   | -.....AA.....C.U.....U.....C.A.....-.....                                        | 58  |
| CavV | 1   | G.....A.....U.....U.A.....-.....                                                 | 59  |
| DKNV | 60  | GUCUGCUAGAGACGCUAAACUCU-AGCAAUUA <u>UACUAGCC</u> ACAUCAGUUGCUUAAAGAAC            | 118 |
| NDiV | 59  | .....UC.....G.UA.C.A..C.....                                                     | 118 |
| CavV | 60  | .....AUC.....G.U..CCA..C.....                                                    | 119 |
| DKNV | 119 | CAC <u>UUUGAGACACUCU</u> CCCCACUUAAC <u>AUCUUUU</u> AGGAAUCUUUGAUGCUACAACAACUUGG | 178 |
| NDiV | 119 | .U.....C.....                                                                    | 178 |
| CavV | 120 | .U.....C.....                                                                    | 179 |
| DKNV | 179 | CUAGUAUAACAGCAA <u>UUCGU</u> AUUUUUA-AGUUUAAGUGGUUUUUACGCCCAUACUU-               | 236 |
| NDiV | 179 | .....-.....AU.....CG.A..C..C.....G....A..-CCA..G.U...A...U                       | 236 |
| CavV | 180 | .....-.....AU.....CA.AC.A..C.C.....G....A..-CCA..G.U...A...U                     | 237 |
| DKNV | 237 | AAUUGAUUUUGUUUGCUAUUGUUACAACUAUUUCAUCAUUAACAGAGGCUAUAUUCUAGUG                    | 296 |
| NDiV | 237 | G.AA.G.....-.....GU...AC.C..-G-.....--.....                                      | 291 |
| CavV | 238 | G.AA.G.....-.....G..UG.GC..G..--.....-..A.....                                   | 293 |
| DKNV | 297 | CUCAGCGCGUAAUAGAAGUA--CUUUUACAGUAGCAUGAGUUUGUUGUAAAUCGUCUUG                      | 354 |
| NDiV | 292 | ....U.A.....C.-.....AU...GCG..A...U.....A.....                                   | 350 |
| CavV | 294 | ....U.A.....-...ACG..GCG.....U.....A.....                                        | 352 |
| DKNV | 355 | AUACGACACAUCUAAA <u>AUG</u>                                                      | 373 |
| NDiV | 351 | .....-----C.....                                                                 | 363 |
| CavV | 353 | .....-----C.....                                                                 | 365 |

Start codon

**Fig. S6** Alignment of the 5'-UTR sequences among DKNV, NDiV, and CavV. TRSs for subgenomic mRNA2 and mRNA3 are enclosed by dotted and solid lines, respectively. Sources for TRSs in CavV and NDiV are obtained from [8] and [9], respectively.

Fig. S7

Characterization of Dak Nong virus, a insect nidovirus isolated from *Culex* mosquitoes in Vietnam in Archives of Virology by Kuwata *et al.*. Corresponding author; Haruhiko Isawa, Ph. D. of National Institute of Infectious Diseases. E-mail, hisawa@nih.go.jp

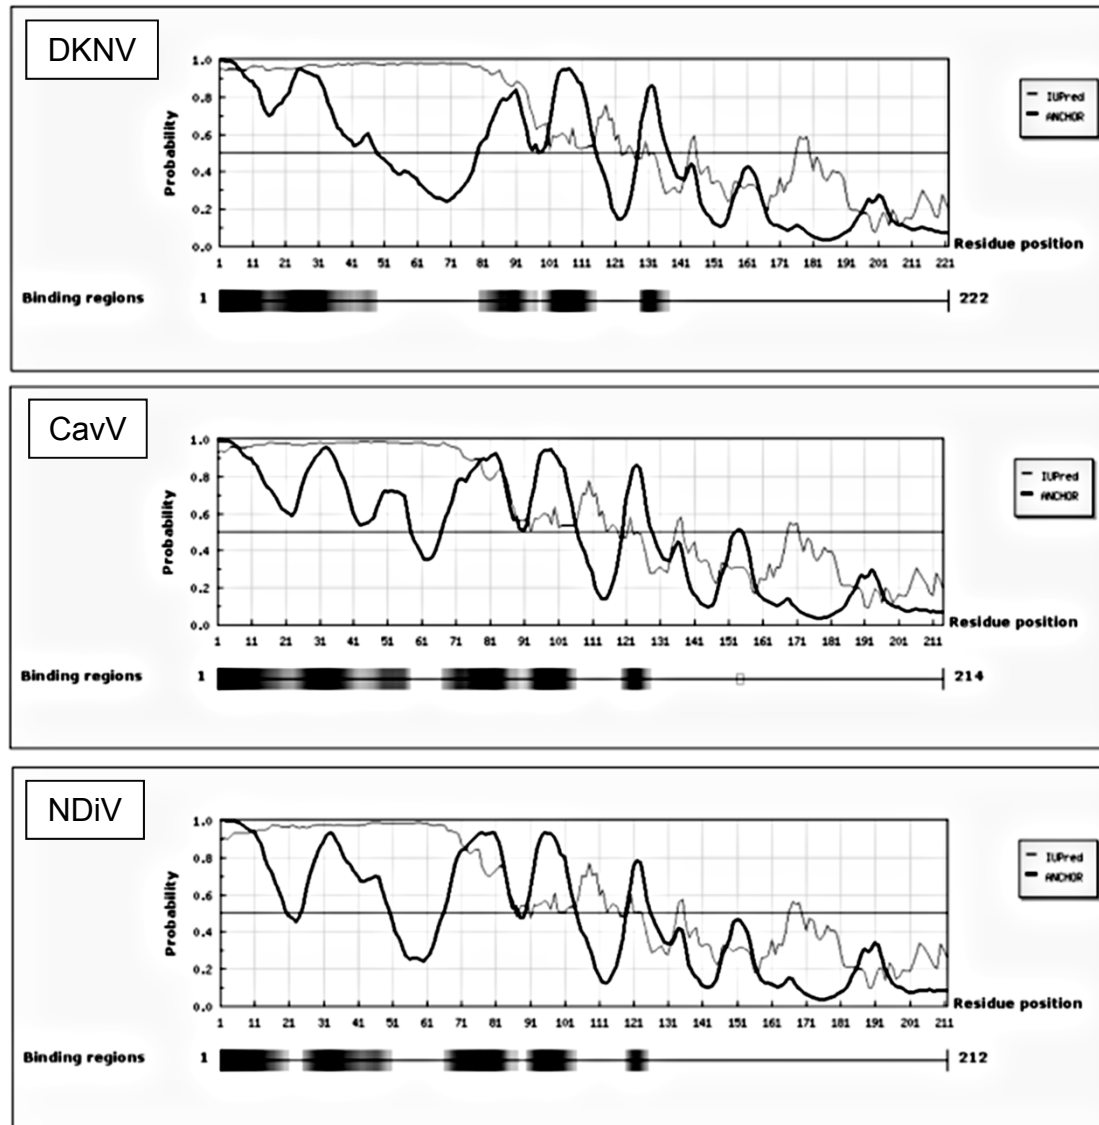

**Fig. S7** Order/Disorder prediction for the putative nucleocapsid proteins of DKNV, CavV, and NDIV. The patterns of the three graphs are quite similar to each other; the anterior half of the peptides exhibits regional disorder, while the posterior half exhibits regional order.
